# Supplementary material for: The Positive Association between Subclinical Hypothyroidism and Newly-Diagnosed Hypertension Is More Explicit in Female Individuals Younger than 65
Source: PubMed Central journal article supplement — Endocrinol Metab (Seoul). 2021 Aug 10;36(4):778–89. doi: 10.3803/EnM.2021.1101 (PMC8419610; doi:10.3803/enm.2021.1101), 2021-08-10
Supplement: enm-2021-1101-suppl2.pdf [file enm-2021-1101-suppl2.pdf]

**Supplemental Table S2.** Stratified Relationships between SCH and Blood Pressure Parameters in the Propensity Matched Population

|                             | Number | HTN                                 | S1-HTN                              | S2-HTN                              | SBP                    | DBP                    | PP                     | MAP                    |
|-----------------------------|--------|-------------------------------------|-------------------------------------|-------------------------------------|------------------------|------------------------|------------------------|------------------------|
| Male subjects aged <65 yr   |        |                                     |                                     |                                     |                        |                        |                        |                        |
| Euthyroid                   | 18,135 | Reference                           | Reference                           | Reference                           | Reference              | Reference              | Reference              | Reference              |
| SCH Model 1                 | 2,118  | 1.200<br>(1.095–1.314) <sup>a</sup> | 1.082<br>(0.984–1.188)              | 1.181<br>(1.059–1.317) <sup>a</sup> | 0.92±0.33 <sup>a</sup> | 0.93±0.25 <sup>a</sup> | -0.01±0.27             | 0.93±0.25 <sup>a</sup> |
| SCH Model 2                 | 2,118  | 1.195<br>(1.091–1.309) <sup>a</sup> | 1.084<br>(0.987–1.191)              | 1.171<br>(1.049–1.307) <sup>a</sup> | 0.83±0.32 <sup>b</sup> | 0.88±0.25 <sup>a</sup> | -0.05±0.27             | 0.86±0.25 <sup>a</sup> |
| Female subjects aged <65 yr |        |                                     |                                     |                                     |                        |                        |                        |                        |
| Euthyroid                   | 14,908 | Reference                           | Reference                           | Reference                           | Reference              | Reference              | Reference              | Reference              |
| SCH Model 1                 | 3,037  | 1.209<br>(1.118–1.308) <sup>a</sup> | 1.056<br>(0.970–1.150)              | 1.334<br>(1.198–1.486) <sup>a</sup> | 1.93±0.30 <sup>a</sup> | 1.12±0.20 <sup>a</sup> | 0.81±0.24 <sup>a</sup> | 1.39±0.21 <sup>a</sup> |
| SCH Model 2                 | 3,037  | 1.211<br>(1.119–1.309) <sup>a</sup> | 1.065<br>(0.978–1.160)              | 1.320<br>(1.184–1.471) <sup>a</sup> | 1.77±0.30 <sup>a</sup> | 1.06±0.20 <sup>a</sup> | 0.71±0.24 <sup>a</sup> | 1.30±0.21 <sup>a</sup> |
| Male subjects aged ≥65 yr   |        |                                     |                                     |                                     |                        |                        |                        |                        |
| Euthyroid                   | 1,418  | Reference                           | Reference                           | Reference                           | Reference              | Reference              | Reference              | Reference              |
| SCH Model 1                 | 310    | 0.902<br>(0.694–1.173)              | 0.933<br>(0.711–1.226)              | 0.967<br>(0.751–1.243)              | 0.04±1.19              | 0.56±0.75              | -0.52±0.99             | 0.39±0.79              |
| SCH Model 2                 | 310    | 0.895<br>(0.687–1.165)              | 0.933<br>(0.709–1.227)              | 0.960<br>(0.746–1.236)              | 0.06±1.19              | 0.49±0.75              | -0.44±0.10             | 0.35±0.79              |
| Female subjects aged ≥65 yr |        |                                     |                                     |                                     |                        |                        |                        |                        |
| Euthyroid                   | 1,181  | Reference                           | Reference                           | Reference                           | Reference              | Reference              | Reference              | Reference              |
| SCH Model 1                 | 321    | 1.324<br>(1.010–1.734) <sup>b</sup> | 1.405<br>(1.077–1.833) <sup>b</sup> | 0.957<br>(0.743–1.234)              | 0.09±1.19              | 1.88±0.75 <sup>b</sup> | -1.79±1.05             | 1.28±0.77              |
| SCH Model 2                 | 321    | 1.281<br>(0.975–1.682)              | 1.392<br>(1.065–1.819) <sup>b</sup> | 0.934<br>(0.724–1.206)              | -0.14±1.19             | 1.77±0.75 <sup>b</sup> | -1.91±1.05             | 1.13±0.77              |

Values are expressed as odds ratio (95% confidence interval) or linear regression coefficient±standard deviation. Model 1: crude; Model 2: adjusted for diabetes and body mass index.

SCH, subclinical hypothyroidism; HTN, hypertension; S1-HTN, stage 1 hypertension; S2-HTN, stage 2 hypertension; SBP, systolic blood pressure; DBP, diastolic blood pressure; PP, pulse pressure; MAP, mean arterial pressure.

<sup>a</sup> $P<0.01$ ; <sup>b</sup> $P<0.05$ .
